# Supplementary material for: An EPR Study on Highly Stable Nitroxyl-Nitroxyl Biradicals for Dynamic Nuclear Polarization Applications at High Magnetic Fields
Source: MDPI journal article supplement (doi:10.3390/molecules28041926), 2023-02-17
Supplement: s1 [file s1]

---

## Supplementary Materials

# An EPR Study on Highly Stable Nitroxyl-Nitroxyl Biradicals for Dynamic Nuclear Polarization Applications at High Magnetic Fields

Nargiz B. Asanbaeva <sup>1</sup>, Sergey A. Dobrynin <sup>1</sup>, Denis A. Morozov <sup>1</sup>, Nadia Haro-Mares <sup>2</sup>, Torsten Gutmann <sup>2</sup>, Gerd Buntkowsky <sup>2</sup> and Elena G. Bagryanskaya <sup>1,\*</sup>

<sup>1</sup> N.N. Vorozhtsov Institute of Organic Chemistry, 9 Ac. Lavrentiev Avenue, Novosibirsk 630090, Russia

<sup>2</sup> TU Darmstadt, Eduard-Zintl-Institute for Inorganic and Physical Chemistry, Alarich-Weiss-Straße 8, 64287 Darmstadt, Germany

\* Correspondence: egbagryanskaya@nioch.nsc.ru

### 1. EPR sample preparation

EPR samples for W-band measurements of **3**–**4** were dissolved at a concentration of ~100  $\mu\text{M}$  in a mixture of deuterated DMSO and methanol (at 20:30, v/v) immediately before the experiments. Approximately 2  $\mu\text{L}$  aliquots of these solutions were placed into quartz W-band EPR tubes (0.6 mm inner diameter, open at one end), which were shock-frozen in liquid nitrogen prior to insertion into the precooled cavity. The solvent mixtures used resulted in transparent glassy samples upon rapid freezing.

### 2. W-band echo-detected spectra

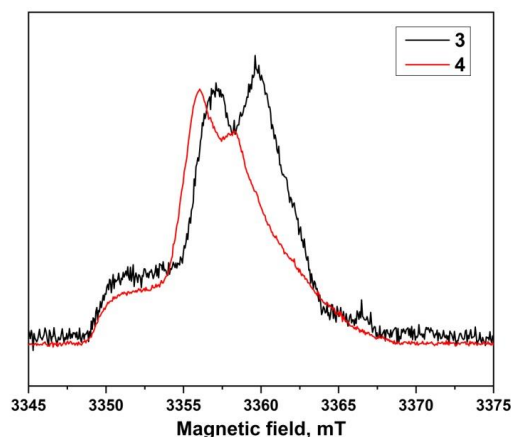

**Figure S1.** 94 GHz echo-detected EPR spectra (black – for **3**, red – for **4**) at 80 K.

Pulsed EPR experiments at W-band (94 GHz) microwave (MW) frequency were acquired on a Bruker Elexsys E680X EPR spectrometer.  $\pi/2$  pulse lengths of 16 ns were achieved. The experiments were carried out at a temperature of 80 K.

### 3. Relaxation measurements

The spin-lattice relaxation time of the biradicals was measured by the inversion recovery method. The phase relaxation time of the samples was measured by means of primary echo decay.

---

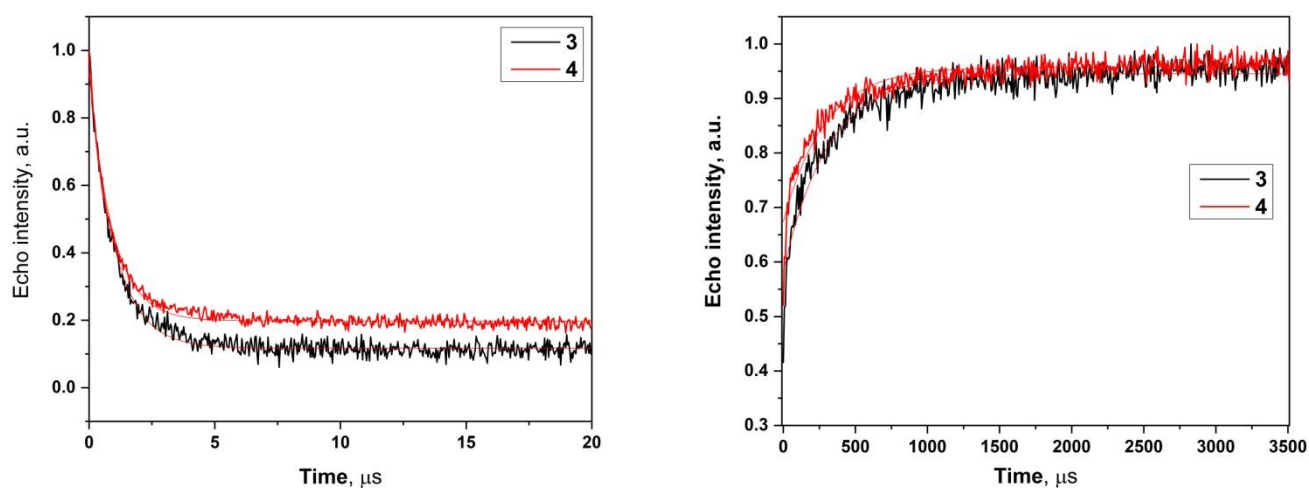

**Figure S2.** Left: Intensity of spin echo of biradicals 3-4 at 80 K as a function of the time. Right: Inversion-recovery time traces of biradicals 3-4 at 80 K along with mono-exponential fits.

The obtained traces were fitted by mono-exponential functions. The results of fitting are presented in Table S1.

**Table S1.** Parameters of relaxation times for biradicals 3-4.

| Biradical | $T_2$ , $\mu\text{s}$ | $T_1$ , ms      |
|-----------|-----------------------|-----------------|
| 3         | $1.01 \pm 0.01$       | $0.31 \pm 0.01$ |
| 4         | $0.92 \pm 0.01$       | $0.29 \pm 0.01$ |
